# Supplementary material
Source: MDPI journal article supplement (https://www.mdpi.com/2076-3417/13/9/5553)
Supplement: s1 [file s1]

# Supplementary Material

## Exploring Promising Biomarkers for Alzheimer's disease through the Computational Analysis of Peripheral Blood Single-Cell RNA Sequencing Data

Marios G. Krokidis\*, Aristidis G. Vrahatis, Konstantinos Lazaros and Panagiotis Vlamos

\*Correspondence: mkrokidis@ionio.gr

In this section, we provide an explanation of why we chose SCALEX as our preferred data integration algorithm for combining the five batches, over other potential algorithms. To validate our decision, we assessed the effectiveness of three alternative data integration algorithms, namely BBKNN, Scanorama, and Harmony (Harmony's Python implementation). It is worth mentioning that Scanorama and Harmony are among the integration algorithms that have demonstrated superior performance on pbmc single cell data, according to a benchmarking study by Luecken et al. [4].

**BBKNN:** This is an scRNA-seq data integration algorithm created by Polanski et al [1]. It can be used directly in any scapy workflow. It is essentially an alternative to scanpy's neighbor computation function (`scanpy.pp.neighbors`). The algorithm creates a neighbor graph of the cells available within the data. It begins by identifying the  $k$  nearest neighbors for each cell across the entire data. To counteract for batch effects within the data, the algorithm identifies a smaller set of  $k$  nearest neighbors for each batch separately, instead of the whole dataset. These nearest neighbors from each of the batches are then merged into the final neighbor list for each cell. That way, connections are created between analogous cells in different batches. The following are the tsne maps before and after integration with BBKNN:

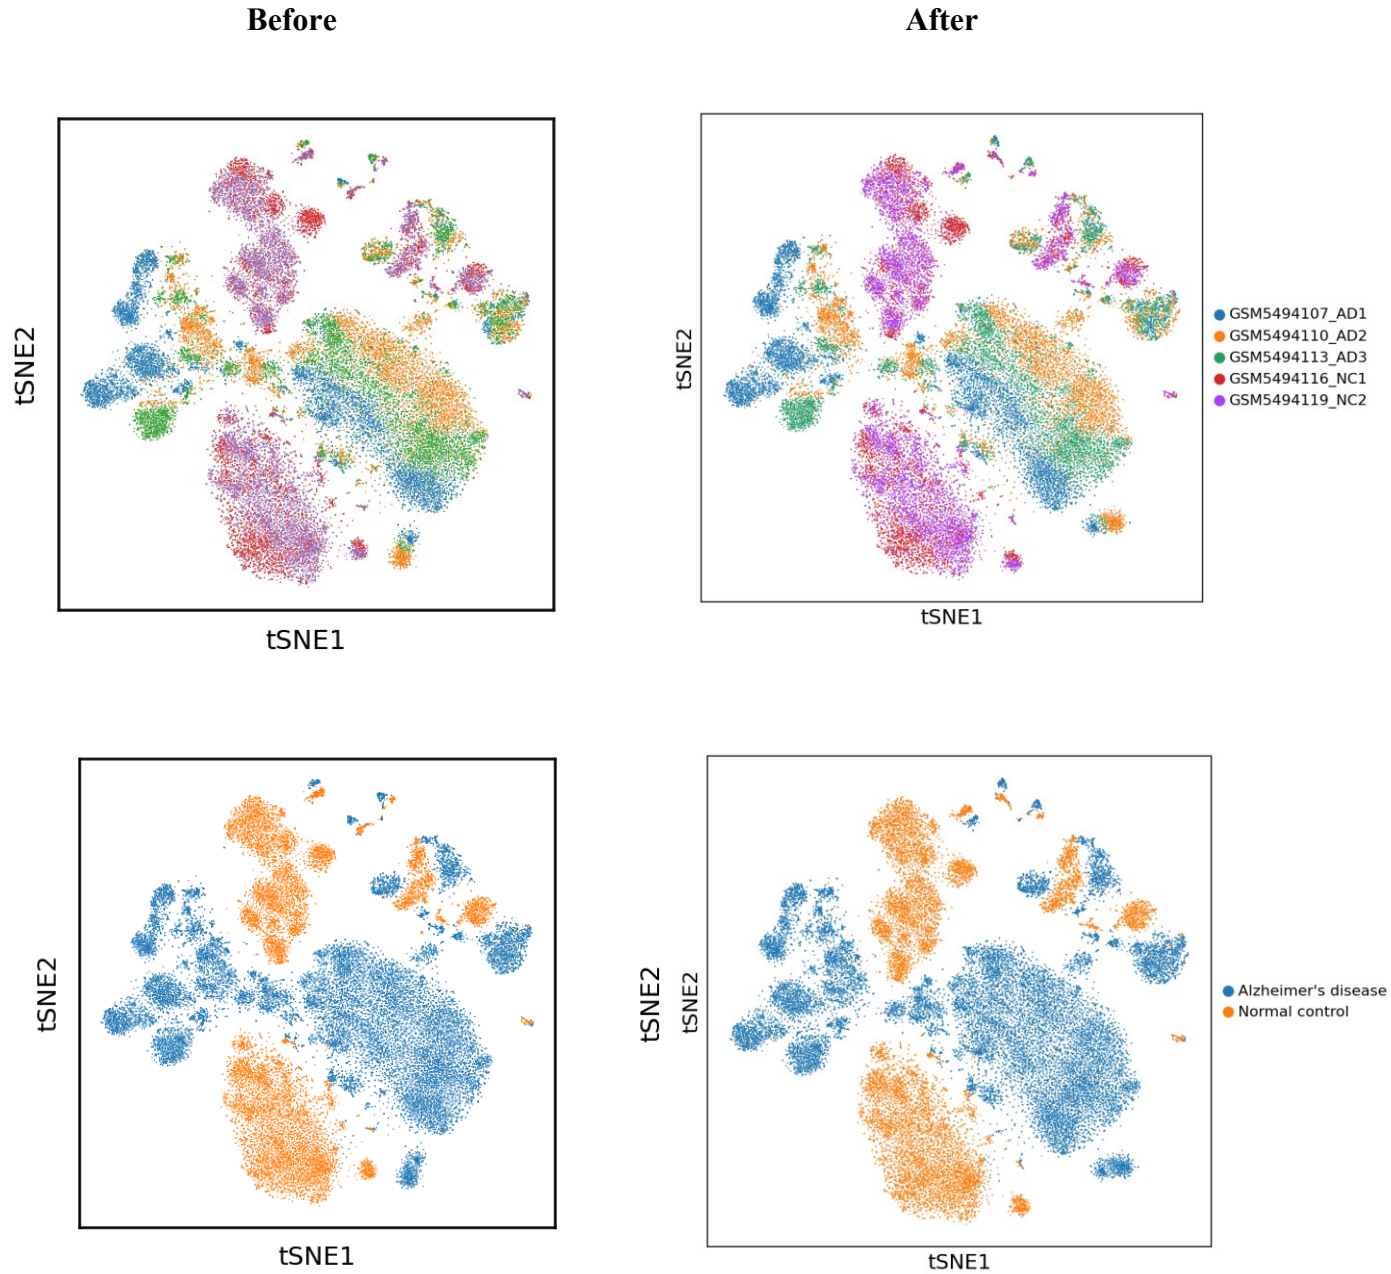

**Figure S1.** tSNE embeddings of GSE181279 scRNA-seq dataset before (left) and after integration with BBKNN (right); A) tSNE embeddings colored by batch types. B) tSNE embeddings colored by disease types. Evidently, in both instances, BBKNN is unable to rectify batch effects present in the data. This likely suggests that the dataset used for this research is too intricate for the algorithm to handle effectively.

2. **Scanorama**: is a scRNA-seq data integration created by Hie et al [2]. It is a generalization of the mutual nearest neighbors matching algorithm that finds similar cells among many datasets instead of only 2 at a time. Randomized SVD is also used as a dimensionality reduction technique in order to improve the algorithm's robustness to noise. The following are the tsne maps before and after integration with Scanorama:

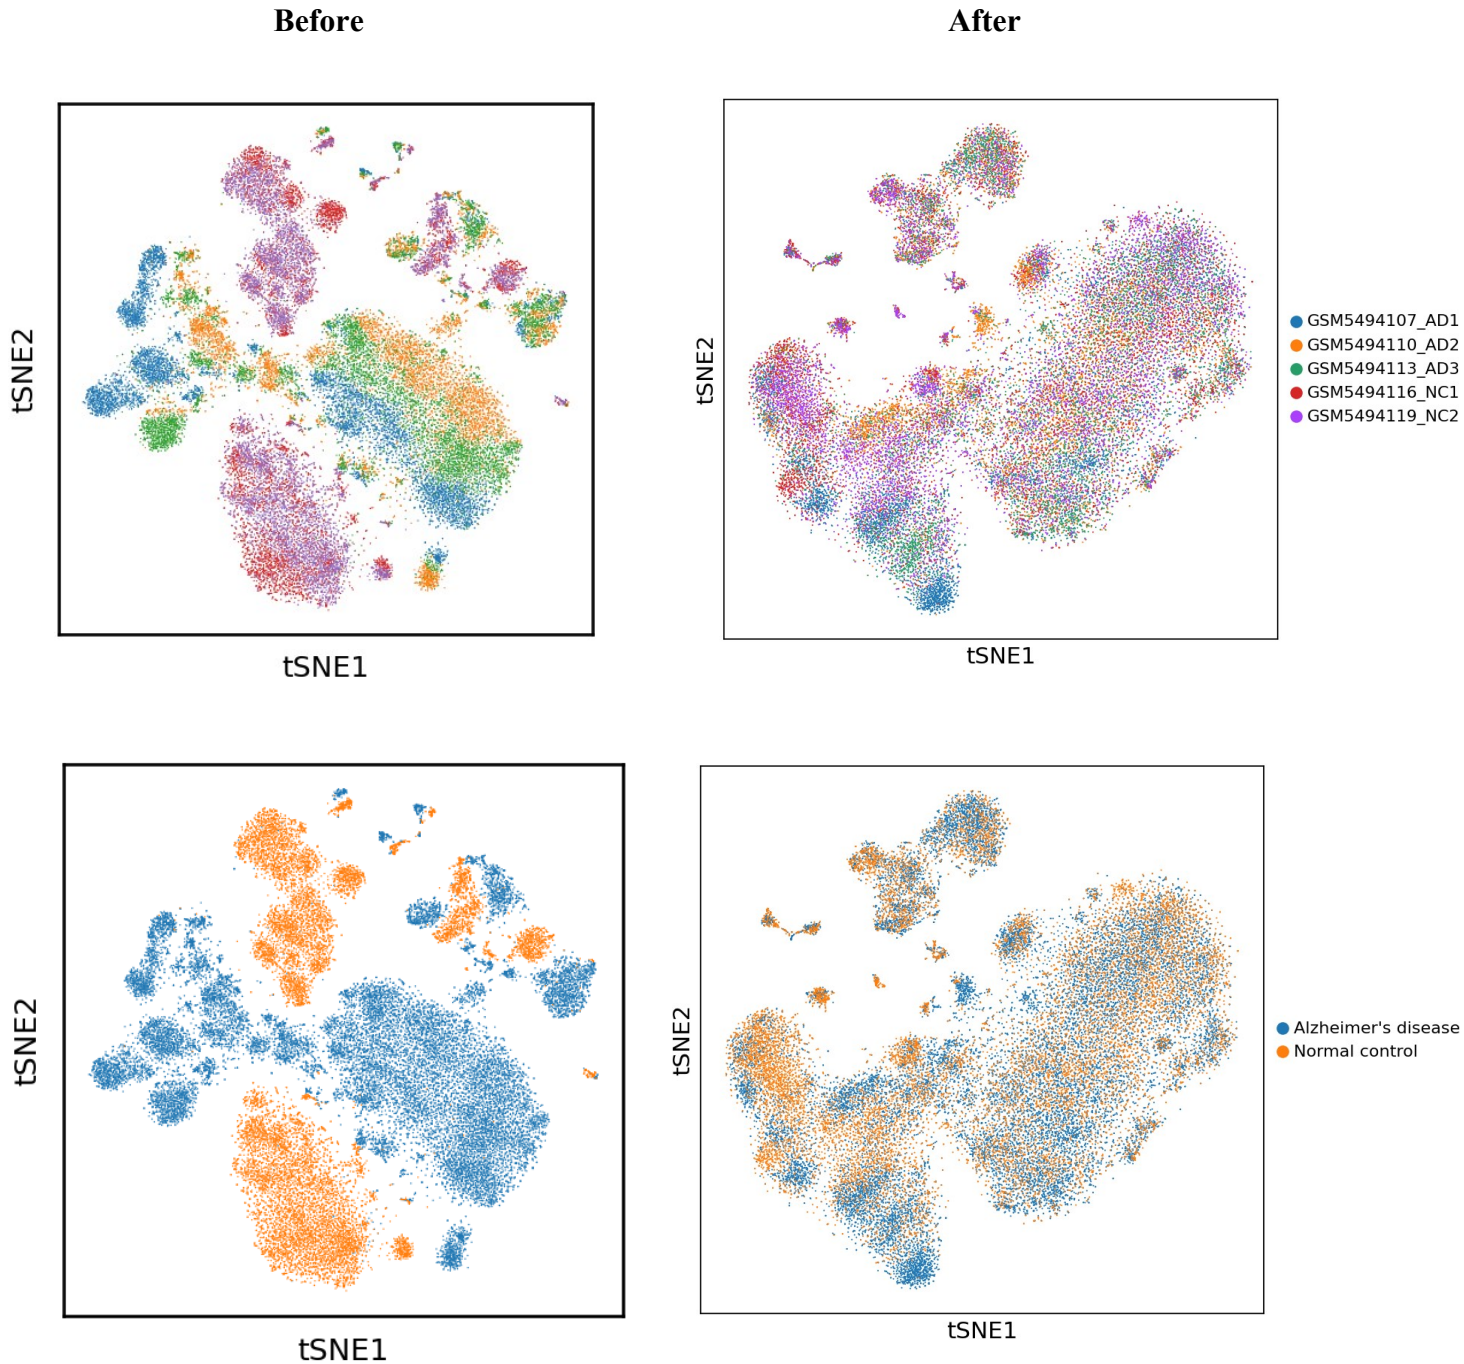

**Figure S2.** tSNE embeddings of GSE181279 scRNA-seq dataset before (left) and after integration with Scanorama (right); A) tSNE embeddings colored by batch types. B) tSNE embeddings colored by disease types. Scanorama manages to change the pattern of the data. This signifies that the algorithm has successfully addressed batch effects. Nonetheless, the complete mixing of cells might also imply overmixing or overcorrection. If the dataset's authors had supplied cell type labels, this issue could have been more definitively resolved.



**3. Harmony:** is a scRNA-seq data integration algorithm created by Korsunsky et al [3]. It was first implemented in R. Since its introduction, it has been implemented in python as well (harmonypy can be used directly through scanpy). Harmony accepts each cell's coordinates in a reduced feature space created through the use of PCA. It makes use of fuzzy clustering in order to assign each cell to multiple clusters (a penalty term is utilized to ensure that within cluster diversity is maximized).

A global centroid is calculated for each cluster along with data-specific centroids for each cluster. In each cluster, a correction factor for each dataset is calculated based on the centroids. Last but not least, the algorithm corrects each cell using a cell specific correction factor (it is a linear combination of dataset correction factors weighted by the cell's soft cluster assignments made in the first step of the algorithm). The following are the tsne maps before and after integration with Harmonypy:

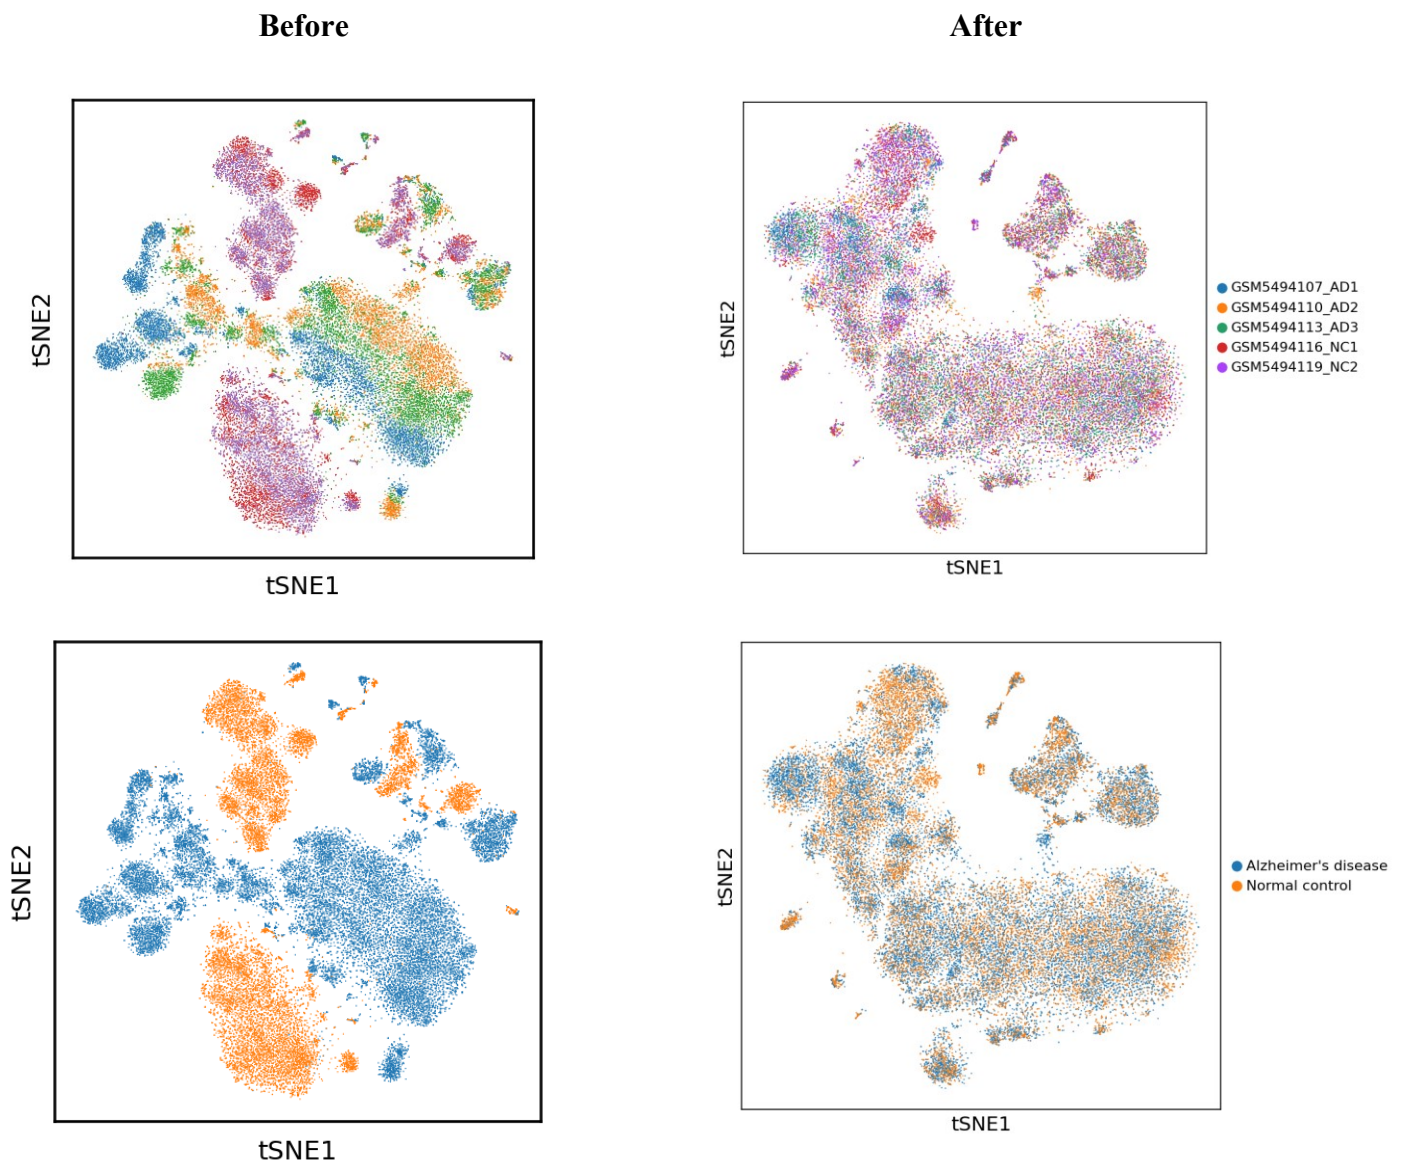

**Figure S3.** tSNE embeddings of GSE181279 scRNA-seq dataset before (left) and after integration with Harmony (right); A) tSNE embeddings colored by batch types. B) tSNE embeddings colored by disease types. Harmony manages to change the pattern of the data. This is an indicator that it has managed to correct for batch effects. However, the fact that cells have now been completely mixed could also be an indicator of overmixing/overcorrection. This would have been clarified had the cell type labels been provided by the authors of the dataset.

## References:

- [1] Polański, K., Young, M. D., Miao, Z., Meyer, K. B., Teichmann, S. A., Park, J. E. BBKNN: fast batch alignment of single cell transcriptomes. *Bioinformatics*, **2020** 36, 964-965.
- [2] Hie, B., Bryson, B., & Berger, B. Efficient integration of heterogeneous single-cell transcriptomes using Scanorama. *Nature biotechnology*, **2019** 37, 685-691.
- [3] Abdelaal, T., Michielsen, L., Cats, D., Hoogduin, D., Mei, H., Reinders, M. J., & Mahfouz, A. A comparison of automatic cell identification methods for single-cell RNA sequencing data. *Genome biology*, **2019** 20, 1-19.
- [4] Luecken MD, Büttner M, Chaichoompu K, Danese A, Interlandi M, Mueller MF, Strobl DC, Zappia L, Dugas M, Colomé-Tatché M, Theis FJ. Benchmarking atlas-level data integration in single-cell genomics. *Nature methods*, **2022** 19, 41-50.

**Table S1.** The top 10 enriched Reactome pathways for DEGs

| Index | Name                                                                                    | P-value     | Adjusted p-value | Odds Ratio | Combined score |
|-------|-----------------------------------------------------------------------------------------|-------------|------------------|------------|----------------|
| 1     | Translocation of ZAP-70 to immunological synapse R-HSA-202430                           | 0.000001559 | 0.00009637       | 61.18      | 818.06         |
| 2     | Endosomal/vacuolar pathway R-HSA-1236977                                                | 0.00002186  | 0.0005485        | 73.84      | 792.37         |
| 3     | Phosphorylation of CD3 and TCR Zeta Chains R-HSA-202427                                 | 0.000003135 | 0.0001662        | 49.70      | 629.84         |
| 4     | PD-1 signaling R-HSA-389948                                                             | 0.000003857 | 0.0001789        | 46.77      | 583.07         |
| 5     | Cross-presentation Of Particulate Exogenous Antigens (Phagosomes) R-HSA-1236973         | 0.0007347   | 0.01239          | 65.00      | 469.04         |
| 6     | Immunoregulatory Interactions Between A Lymphoid And A non-Lymphoid Cell R-HSA-198933   | 8.566e-10   | 1.059e-7         | 18.62      | 388.84         |
| 7     | Antigen presentation: Folding, Assembly, Peptide Loading of Class I MHC R-HSA-983170    | 0.00001283  | 0.0004760        | 33.12      | 373.05         |
| 8     | Scavenging By Class A Receptors R-HSA-3000480                                           | 0.0001246   | 0.002568         | 36.91      | 331.81         |
| 9     | Nef Mediated Downregulation of MHC Class I Complex Cell Surface Expression R-HSA-164940 | 0.001173    | 0.01856          | 48.75      | 328.95         |
| 10    | Generation Of Second Messenger Molecules R-HSA-202433                                   | 0.00002218  | 0.0005485        | 28.38      | 304.16         |

**Table S2.** The top 10 enriched biological processes for DEGs

| Index | Name                                                                                                           | P-value     | Adjusted p-value | Odds Ratio | Combined score |
|-------|----------------------------------------------------------------------------------------------------------------|-------------|------------------|------------|----------------|
| 1     | peptide antigen assembly with MHC protein complex (GO:0002501)                                                 | 1.026e-8    | 0.000002669      | 397.88     | 7318.83        |
| 2     | antigen processing and presentation of exogenous peptide antigen via MHC class I, TAP-independent (GO:0002480) | 0.000007505 | 0.0004435        | 118.16     | 1394.33        |
| 3     | antigen processing and presentation of endogenous peptide antigen (GO:0002483)                                 | 6.634e-7    | 0.00006996       | 79.54      | 1131.58        |
| 4     | regulation of glial cell migration (GO:1903975)                                                                | 0.0002651   | 0.005302         | 130.02     | 1070.77        |
| 5     | regulation of hippocampal neuron apoptotic process (GO:0110089)                                                | 0.0002651   | 0.005302         | 130.02     | 1070.77        |
| 6     | regulation of microglial cell mediated cytotoxicity (GO:1904149)                                               | 0.0002651   | 0.005302         | 130.02     | 1070.77        |
| 7     | regulation of neutrophil activation (GO:1902563)                                                               | 0.0002651   | 0.005302         | 130.02     | 1070.77        |
| 8     | positive regulation of CD4-positive, CD25-positive, alpha-beta regulatory T cell differentiation (GO:0032831)  | 0.0002651   | 0.005302         | 130.02     | 1070.77        |
| 9     | positive regulation of mast cell activation involved in immune response (GO:0033008)                           | 0.0002651   | 0.005302         | 130.02     | 1070.77        |
| 10    | intracellular sequestering of iron ion (GO:0006880)                                                            | 0.0002651   | 0.005302         | 130.02     | 1070.77        |

**Table S3.** The top 10 enriched molecular functions for DEGs

| Index | Name                                                                        | P-value     | Adjusted p-value | Odds Ratio | Combined score |
|-------|-----------------------------------------------------------------------------|-------------|------------------|------------|----------------|
| 1     | MHC class II receptor activity (GO:0032395)                                 | 8.515e-10   | 1.379e-7         | 200.92     | 4196.00        |
| 2     | C-X3-C chemokine binding (GO:0019960)                                       | 0.0002651   | 0.01431          | 130.02     | 1070.77        |
| 3     | MHC class II protein complex binding (GO:0023026)                           | 0.000001559 | 0.0001262        | 61.18      | 818.06         |
| 4     | ferric iron binding (GO:0008199)                                            | 0.0005529   | 0.01639          | 78.00      | 585.05         |
| 5     | superoxide-generating NADPH oxidase activator activity (GO:0016176)         | 0.0007347   | 0.01700          | 65.00      | 469.04         |
| 6     | Tat protein binding (GO:0030957)                                            | 0.001173    | 0.02375          | 48.75      | 328.95         |
| 7     | superoxide-generating NAD(P)H oxidase activity (GO:0016175)                 | 0.001429    | 0.02571          | 43.33      | 283.84         |
| 8     | oxidoreductase activity, acting on NAD(P)H, oxygen as acceptor (GO:0050664) | 0.002690    | 0.03962          | 29.99      | 177.48         |
| 9     | IgG binding (GO:0019864)                                                    | 0.02573     | 0.1789           | 48.28      | 176.71         |
| 10    | MHC class I protein complex binding (GO:0023024)                            | 0.02573     | 0.1789           | 48.28      | 176.71         |

**Table S4.** The top 10 enriched cellular components for DEGs

| Index | Name                                                                              | P-value     | Adjusted p-value | Odds Ratio | Combined score |
|-------|-----------------------------------------------------------------------------------|-------------|------------------|------------|----------------|
| 1     | MHC protein complex (GO:0042611)                                                  | 1.640e-18   | 2.082e-16        | 211.55     | 8663.54        |
| 2     | MHC class II protein complex (GO:0042613)                                         | 1.400e-13   | 8.890e-12        | 239.23     | 7080.42        |
| 3     | MHC class I protein complex (GO:0042612)                                          | 0.000002701 | 0.00002450       | 196.96     | 2525.42        |
| 4     | luminal side of endoplasmic reticulum membrane (GO:0098553)                       | 1.159e-12   | 3.679e-11        | 82.82      | 2276.11        |
| 5     | integral component of luminal side of endoplasmic reticulum membrane (GO:0071556) | 1.159e-12   | 3.679e-11        | 82.82      | 2276.11        |
| 6     | phagolysosome (GO:0032010)                                                        | 0.0002651   | 0.001295         | 130.02     | 1070.77        |
| 7     | secondary lysosome (GO:0005767)                                                   | 0.000001197 | 0.00001169       | 66.28      | 903.79         |
| 8     | ER to Golgi transport vesicle membrane (GO:0012507)                               | 3.471e-10   | 8.561e-9         | 35.96      | 783.26         |
| 9     | coated vesicle membrane (GO:0030662)                                              | 4.045e-10   | 8.561e-9         | 35.19      | 761.17         |
| 10    | transport vesicle membrane (GO:0030658)                                           | 8.320e-10   | 1.510e-8         | 31.80      | 664.87         |

**Table S5.** The top 5 enriched Reactome pathways for *EFhd2*

| Index | Name                                                             | P-value  | Adjusted p-value | Odds Ratio | Combined score |
|-------|------------------------------------------------------------------|----------|------------------|------------|----------------|
| 1     | RHOD GTPase Cycle R-HSA-9013405                                  | 0.002600 | 0.01300          | 19948.00   | 118735.70      |
| 2     | RHO GTPase Cycle R-HSA-9012999                                   | 0.02205  | 0.04125          | 19559.00   | 74606.82       |
| 3     | Signaling By Rho GTPases R-HSA-194315                            | 0.03220  | 0.04125          | 19356.00   | 66503.24       |
| 4     | Signaling By Rho GTPases, Miro GTPases and RHOBTB3 R-HSA-9716542 | 0.03300  | 0.04125          | 19340.00   | 65973.64       |
| 5     | Signal Transduction R-HSA-162582                                 | 0.1232   | 0.1232           | 17535.00   | 36710.27       |

**Table S6.** The top 10 enriched Reactome pathways for *Rhoc*

| Index | Name                                                                | P-value   | Adjusted p-value | Odds Ratio | Combined score |
|-------|---------------------------------------------------------------------|-----------|------------------|------------|----------------|
| 1     | RHO GTPases activate Rhotekin and Rhophilins R-HSA-5666185          | 0.0004500 | 0.004800         | 19991.00   | 154056.47      |
| 2     | RHO GTPases activate ROCKs R-HSA-5627117                            | 0.0009500 | 0.004800         | 19981.00   | 139049.21      |
| 3     | RHO GTPases activate CIT R-HSA-5625900                              | 0.0009500 | 0.004800         | 19981.00   | 139049.21      |
| 4     | Sema4D induced Cell Migration and Growth-Cone Collapse R-HSA-416572 | 0.001000  | 0.004800         | 19980.00   | 138017.41      |
| 5     | Sema4D in Semaphorin Signaling R-HSA-400685                         | 0.001200  | 0.004800         | 19976.00   | 134347.69      |
| 6     | RHO GTPases activate PKNs R-HSA-5625740                             | 0.003100  | 0.008667         | 19938.00   | 115169.25      |
| 7     | Semaphorin interactions R-HSA-373755                                | 0.003200  | 0.008667         | 19936.00   | 114524.75      |
| 8     | RHOC GTPase Cycle R-HSA-9013106                                     | 0.003650  | 0.008667         | 19927.00   | 111851.11      |
| 9     | G Alpha (12/13) Signaling Events R-HSA-416482                       | 0.003900  | 0.008667         | 19922.00   | 110503.22      |
| 10    | RHO GTPases activate Formins R-HSA-5663220                          | 0.005950  | 0.01190          | 19881.00   | 101877.73      |

**Table S7.** The top 10 enriched biological processes for *Rhoc*

| Index | Name                                                               | P-value   | Adjusted p-value | Odds Ratio | Combined score |
|-------|--------------------------------------------------------------------|-----------|------------------|------------|----------------|
| 1     | positive regulation of lipase activity (GO:0060193)                | 0.0005000 | 0.008266         | 19990.00   | 151942.59      |
| 2     | regulation of lipase activity (GO:0060191)                         | 0.0007000 | 0.008266         | 19986.00   | 145187.41      |
| 3     | epiboly involved in wound healing (GO:0090505)                     | 0.0008000 | 0.008266         | 19984.00   | 142504.37      |
| 4     | wound healing, spreading of cells (GO:0044319)                     | 0.001200  | 0.008823         | 19976.00   | 134347.69      |
| 5     | cortical cytoskeleton organization (GO:0030865)                    | 0.002050  | 0.008823         | 19959.00   | 123544.89      |
| 6     | positive regulation of stress fiber assembly (GO:0051496)          | 0.002200  | 0.008823         | 19956.00   | 122117.07      |
| 7     | mitotic cytokinesis (GO:0000281)                                   | 0.002450  | 0.008823         | 19951.00   | 119939.12      |
| 8     | positive regulation of actin filament bundle assembly (GO:0032233) | 0.002550  | 0.008823         | 19949.00   | 119129.02      |
| 9     | apical junction assembly (GO:0043297)                              | 0.003000  | 0.008823         | 19940.00   | 115834.63      |
| 10    | cell-cell junction assembly (GO:0007043)                           | 0.003300  | 0.008823         | 19934.00   | 113899.85      |

**Table S8.** The top 10 enriched molecular functions for *Rhoc*

| Index | Name                                                    | P-value  | Adjusted p-value | Odds Ratio | Combined score |
|-------|---------------------------------------------------------|----------|------------------|------------|----------------|
| 1     | GTP binding (GO:0005525)                                | 0.009450 | 0.02432          | 19811.00   | 92353.95       |
| 2     | guanyl ribonucleotide binding (GO:0032561)              | 0.01070  | 0.02432          | 19786.00   | 89779.40       |
| 3     | GTPase activity (GO:0003924)                            | 0.01080  | 0.02432          | 19784.00   | 89586.28       |
| 4     | nucleoside-triphosphatase activity (GO:0017111)         | 0.01390  | 0.02432          | 19722.00   | 84328.81       |
| 5     | purine ribonucleoside triphosphate binding (GO:0035639) | 0.02300  | 0.02530          | 19540.00   | 73710.11       |
| 6     | kinase binding (GO:0019900)                             | 0.02305  | 0.02530          | 19539.00   | 73663.91       |
| 7     | protein kinase binding (GO:0019901)                     | 0.02530  | 0.02530          | 19494.00   | 71678.61       |

**Table S9.** The top 10 enriched cellular components for *Rhoc*

| Index | Name                                                      | P-value | Adjusted p-value | Odds Ratio | Combined score |
|-------|-----------------------------------------------------------|---------|------------------|------------|----------------|
| 1     | neuron projection (GO:0043005)                            | 0.02780 | 0.06000          | 19444.00   | 69662.51       |
| 2     | cytoskeleton (GO:0005856)                                 | 0.03000 | 0.06000          | 19400.00   | 68027.34       |
| 3     | intracellular non-membrane-bounded organelle (GO:0043232) | 0.05790 | 0.07720          | 18842.00   | 53681.64       |
| 4     | intracellular membrane-bounded organelle (GO:0043231)     | 0.2596  | 0.2596           | 14808.00   | 19970.28       |



**Table S10.** The top 10 enriched Reactome pathways for *LMNA*

| Index | Name                                                                                             | P-value   | Adjusted p-value | Odds Ratio | Combined score |
|-------|--------------------------------------------------------------------------------------------------|-----------|------------------|------------|----------------|
| 1     | Depolymerisation of Nuclear Lamina R-HSA-4419969                                                 | 0.0007500 | 0.008066         | 19985.00   | 143801.31      |
| 2     | Initiation of Nuclear Envelope (NE) Reformation R-HSA-2995383                                    | 0.0009500 | 0.008066         | 19981.00   | 139049.21      |
| 3     | Deregulated CDK5 Triggers Neurodegenerative Pathways in Alzheimer's Disease Models R-HSA-8862803 | 0.001050  | 0.008066         | 19979.00   | 137035.71      |
| 4     | Defective Intrinsic Pathway for Apoptosis R-HSA-9734009                                          | 0.001200  | 0.008066         | 19976.00   | 134347.69      |
| 5     | Apoptotic cleavage of Cellular Proteins R-HSA-111465                                             | 0.001900  | 0.008066         | 19962.00   | 125080.30      |
| 6     | XBP1(S) activates Chaperone Genes R-HSA-381038                                                   | 0.002300  | 0.008066         | 19954.00   | 121217.83      |
| 7     | IRE1alpha activates Chaperones R-HSA-381070                                                      | 0.002400  | 0.008066         | 19952.00   | 120356.53      |
| 8     | Apoptotic execution Phase R-HSA-75153                                                            | 0.002600  | 0.008066         | 19948.00   | 118735.70      |
| 9     | Nuclear envelope Breakdown R-HSA-2980766                                                         | 0.002650  | 0.008066         | 19947.00   | 118349.79      |
| 10    | Meiotic synapsis R-HSA-1221632                                                                   | 0.003000  | 0.008066         | 19940.00   | 115834.63      |

**Table S11.** The top 10 enriched Reactome pathways for *LMNA*

| Index | Name                                                                        | P-value   | Adjusted p-value | Odds Ratio | Combined score |
|-------|-----------------------------------------------------------------------------|-----------|------------------|------------|----------------|
| 1     | regulation of cardiac muscle hypertrophy in response to stress (GO:1903242) | 0.0003000 | 0.003087         | 19994.00   | 162186.52      |
| 2     | negative regulation of cardiac muscle hypertrophy (GO:0010614)              | 0.0006000 | 0.003087         | 19988.00   | 148283.12      |
| 3     | positive regulation of cell aging (GO:0090343)                              | 0.0006500 | 0.003087         | 19987.00   | 146675.88      |
| 4     | regulation of cell aging (GO:0090342)                                       | 0.0006500 | 0.003087         | 19987.00   | 146675.88      |
| 5     | mitotic nuclear membrane organization (GO:0101024)                          | 0.002550  | 0.006412         | 19949.00   | 119129.02      |
| 6     | mitotic nuclear membrane reassembly (GO:0007084)                            | 0.002550  | 0.006412         | 19949.00   | 119129.02      |
| 7     | IRE1-mediated unfolded protein response (GO:0036498)                        | 0.002650  | 0.006412         | 19947.00   | 118349.79      |
| 8     | nuclear membrane reassembly (GO:0031468)                                    | 0.002700  | 0.006412         | 19946.00   | 117971.02      |
| 9     | cellular response to decreased oxygen levels (GO:0036294)                   | 0.003450  | 0.007283         | 19931.00   | 112996.74      |
| 10    | protein localization to nucleus (GO:0034504)                                | 0.005300  | 0.01007          | 19894.00   | 104245.78      |

**Table S12.** The top 10 enriched biological processes for *FCER1G*

| Index | Name                                                       | P-value   | Adjusted p-value | Odds Ratio | Combined score |
|-------|------------------------------------------------------------|-----------|------------------|------------|----------------|
| 1     | Platelet adhesion to Exposed Collagen R-HSA-75892          | 0.0006000 | 0.005867         | 19988.00   | 148283.12      |
| 2     | Dectin-2 Family R-HSA-5621480                              | 0.001450  | 0.005867         | 19971.00   | 130534.69      |
| 3     | GPVI-mediated Activation Cascade R-HSA-114604              | 0.001600  | 0.005867         | 19968.00   | 128549.42      |
| 4     | Fc Epsilon Receptor (FCERI) Signaling R-HSA-2454202        | 0.006500  | 0.01292          | 19870.00   | 100064.63      |
| 5     | Cell Surface Interactions at Vascular Wall R-HSA-202733    | 0.006700  | 0.01292          | 19866.00   | 99442.44       |
| 6     | C-type Lectin Receptors (CLRs) R-HSA-5621481               | 0.007050  | 0.01292          | 19859.00   | 98396.17       |
| 7     | Platelet Activation, Signaling and Aggregation R-HSA-76002 | 0.01270   | 0.01996          | 19746.00   | 86214.24       |
| 8     | Neutrophil Degranulation R-HSA-6798695                     | 0.02340   | 0.03217          | 19532.00   | 73343.17       |
| 9     | Hemostasis R-HSA-109582                                    | 0.02880   | 0.03520          | 19424.00   | 68904.42       |
| 10    | Innate Immune System R-HSA-168249                          | 0.05175   | 0.05692          | 18965.00   | 56161.72       |

**Table S13.** The top 10 enriched biological processes for *FCER1G*

| Index | Name                                                                            | P-value   | Adjusted p-value | Odds Ratio | Combined score |
|-------|---------------------------------------------------------------------------------|-----------|------------------|------------|----------------|
| 1     | regulation of cell activation (GO:0050865)                                      | 0.0005000 | 0.004920         | 19990.00   | 151942.59      |
| 2     | immunoglobulin mediated immune response (GO:0016064)                            | 0.0005000 | 0.004920         | 19990.00   | 151942.59      |
| 3     | B cell mediated immunity (GO:0019724)                                           | 0.0005500 | 0.004920         | 19989.00   | 150029.82      |
| 4     | cellular response to low-density lipoprotein particle stimulus (GO:0071404)     | 0.0007000 | 0.004920         | 19986.00   | 145187.41      |
| 5     | neutrophil activation (GO:0042119)                                              | 0.0008000 | 0.004920         | 19984.00   | 142504.37      |
| 6     | positive regulation of interleukin-4 production (GO:0032753)                    | 0.0009000 | 0.004920         | 19982.00   | 140136.55      |
| 7     | myeloid cell activation involved in immune response (GO:0002275)                | 0.0009500 | 0.004920         | 19981.00   | 139049.21      |
| 8     | regulation of platelet activation (GO:0010543)                                  | 0.001100  | 0.004920         | 19978.00   | 136099.47      |
| 9     | regulation of interleukin-4 production (GO:0032673)                             | 0.001150  | 0.004920         | 19977.00   | 135204.64      |
| 10    | immune response-activating cell surface receptor signaling pathway (GO:0002429) | 0.001200  | 0.004920         | 19976.00   | 134347.69      |

**Table S14.** The top 10 enriched biological processes for *PELI1*

| Index | Name                                                               | P-value   | Adjusted p-value | Odds Ratio | Combined score |
|-------|--------------------------------------------------------------------|-----------|------------------|------------|----------------|
| 1     | Toll signaling pathway (GO:0008063)                                | 0.0002500 | 0.003850         | 19995.00   | 165840.18      |
| 2     | negative regulation of necroptotic process (GO:0060546)            | 0.0004500 | 0.003850         | 19991.00   | 154056.47      |
| 3     | negative regulation of programmed necrotic cell death (GO:0062099) | 0.0005500 | 0.003850         | 19989.00   | 150029.82      |
| 4     | regulation of programmed necrotic cell death (GO:0062098)          | 0.001000  | 0.004830         | 19980.00   | 138017.41      |
| 5     | regulation of necroptotic process (GO:0060544)                     | 0.001150  | 0.004830         | 19977.00   | 135204.64      |
| 6     | protein K63-linked ubiquitination (GO:0070534)                     | 0.002200  | 0.007700         | 19956.00   | 122117.07      |
| 7     | protein K48-linked ubiquitination (GO:0070936)                     | 0.002850  | 0.008550         | 19943.00   | 116875.01      |
| 8     | response to molecule of bacterial origin (GO:0002237)              | 0.003650  | 0.009581         | 19927.00   | 111851.11      |
| 9     | interleukin-1-mediated signaling pathway (GO:0070498)              | 0.004700  | 0.01097          | 19906.00   | 106700.27      |
| 10    | response to lipid (GO:0033993)                                     | 0.005700  | 0.01197          | 19886.00   | 102756.96      |

**Table S15.** The top 10 enriched biological processes for *ZEB2*

| Index | Name                                                                                           | P-value   | Adjusted p-value | Odds Ratio | Combined score |
|-------|------------------------------------------------------------------------------------------------|-----------|------------------|------------|----------------|
| 1     | positive regulation of secondary metabolite biosynthetic process (GO:1900378)                  | 0.0004000 | 0.003667         | 19992.00   | 156418.91      |
| 2     | positive regulation of melanin biosynthetic process (GO:0048023)                               | 0.0004000 | 0.003667         | 19992.00   | 156418.91      |
| 3     | regulation of melanin biosynthetic process (GO:0048021)                                        | 0.0005500 | 0.003667         | 19989.00   | 150029.82      |
| 4     | positive regulation of transforming growth factor beta receptor signaling pathway (GO:0030511) | 0.001200  | 0.004800         | 19976.00   | 134347.69      |
| 5     | positive regulation of cellular response to transforming                                       | 0.001200  | 0.004800         | 19976.00   | 134347.69      |

| Index | Name                                                                                                         | P-value  | Adjusted p-value | Odds Ratio | Combined score |
|-------|--------------------------------------------------------------------------------------------------------------|----------|------------------|------------|----------------|
|       | growth factor beta stimulus (GO:1903846)                                                                     |          |                  |            |                |
| 6     | epithelial cell migration (GO:0010631)                                                                       | 0.002050 | 0.006833         | 19959.00   | 123544.89      |
| 7     | regulation of organelle organization (GO:0033043)                                                            | 0.004000 | 0.01111          | 19920.00   | 109987.79      |
| 8     | positive regulation of transmembrane receptor protein serine/threonine kinase signaling pathway (GO:0090100) | 0.004600 | 0.01111          | 19908.00   | 107139.14      |
| 9     | regulation of transforming growth factor beta receptor signaling pathway (GO:0017015)                        | 0.005000 | 0.01111          | 19900.00   | 105436.78      |
| 10    | positive regulation of canonical Wnt signaling pathway (GO:0090263)                                          | 0.006500 | 0.01300          | 19870.00   | 100064.63      |

**Table S16.** The top 10 enriched biological processes for *NR4A2*

| Index | Name                                                            | P-value   | Adjusted p-value | Odds Ratio | Combined score |
|-------|-----------------------------------------------------------------|-----------|------------------|------------|----------------|
| 1     | midbrain dopaminergic neuron differentiation (GO:1904948)       | 0.0005500 | 0.01160          | 19989.00   | 150029.82      |
| 2     | dopaminergic neuron differentiation (GO:0071542)                | 0.001000  | 0.01160          | 19980.00   | 138017.41      |
| 3     | central nervous system neuron differentiation (GO:0021953)      | 0.001700  | 0.01160          | 19966.00   | 127326.11      |
| 4     | regulation of apoptotic signaling pathway (GO:2001233)          | 0.001900  | 0.01160          | 19962.00   | 125080.30      |
| 5     | nucleic acid-templated transcription (GO:0097659)               | 0.002100  | 0.01160          | 19958.00   | 123057.76      |
| 6     | neuron migration (GO:0001764)                                   | 0.002500  | 0.01160          | 19950.00   | 119530.06      |
| 7     | fat cell differentiation (GO:0045444)                           | 0.002900  | 0.01160          | 19942.00   | 116522.32      |
| 8     | canonical Wnt signaling pathway (GO:0060070)                    | 0.003400  | 0.01190          | 19932.00   | 113293.39      |
| 9     | negative regulation of apoptotic signaling pathway (GO:2001234) | 0.003900  | 0.01213          | 19922.00   | 110503.22      |
| 10    | Wnt signaling pathway (GO:0016055)                              | 0.004600  | 0.01288          | 19908.00   | 107139.14      |

**Table S17.** The top 10 enriched Reactome pathways for *LMNA*

| Index | Name                                                                                  | P-value   | Adjusted p-value | Odds Ratio | Combined score |
|-------|---------------------------------------------------------------------------------------|-----------|------------------|------------|----------------|
| 1     | RUNX3 Regulates Immune Response and Cell Migration R-HSA-8949275                      | 0.0003000 | 0.004800         | 19994.00   | 162186.52      |
| 2     | Integrin Cell Surface Interactions R-HSA-216083                                       | 0.003300  | 0.01787          | 19934.00   | 113899.85      |
| 3     | Transcriptional Regulation by RUNX3 R-HSA-8878159                                     | 0.004750  | 0.01787          | 19905.00   | 106484.27      |
| 4     | Potential Therapeutics for SARS R-HSA-9679191                                         | 0.004850  | 0.01787          | 19903.00   | 106058.91      |
| 5     | Immunoregulatory Interactions Between a Lymphoid And A non-Lymphoid Cell R-HSA-198933 | 0.006150  | 0.01787          | 19877.00   | 101200.08      |
| 6     | Cell Surface Interactions At Vascular Wall R-HSA-202733                               | 0.006700  | 0.01787          | 19866.00   | 99442.44       |
| 7     | Extracellular Matrix Organization R-HSA-1474244                                       | 0.01455   | 0.03326          | 19709.00   | 83372.48       |
| 8     | SARS-CoV Infections R-HSA-9679506                                                     | 0.01845   | 0.03690          | 19631.00   | 78380.66       |
| 9     | Hemostasis R-HSA-109582                                                               | 0.02880   | 0.05120          | 19424.00   | 68904.42       |
| 10    | Adaptive Immune System R-HSA-1280218                                                  | 0.03665   | 0.05864          | 19267.00   | 63703.39       |

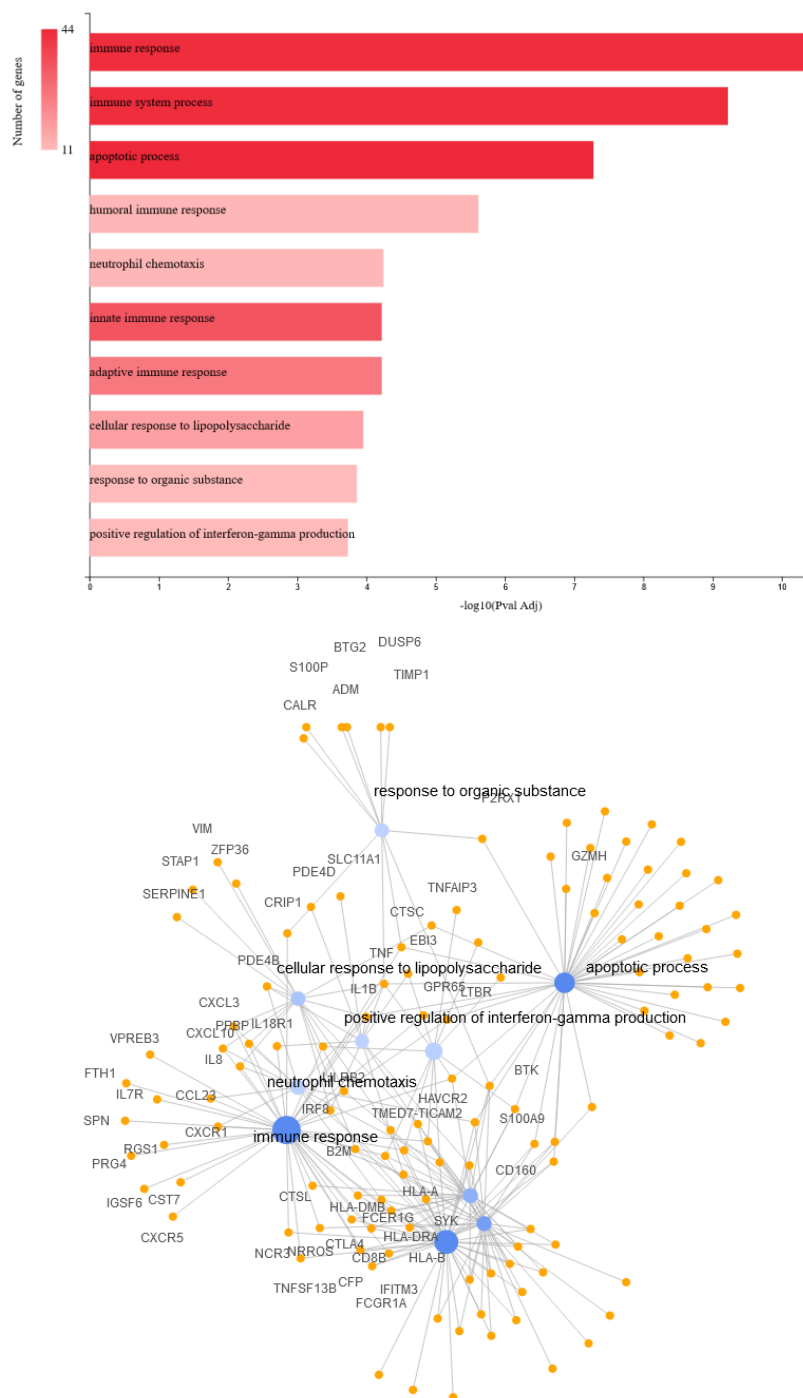

**Figure S4.** GeneCodis ontological analysis and gene-annotation cluster networks. Visualizations generated for 10 top terms of related categories with our identified DEG list are presented here for GO biological process.

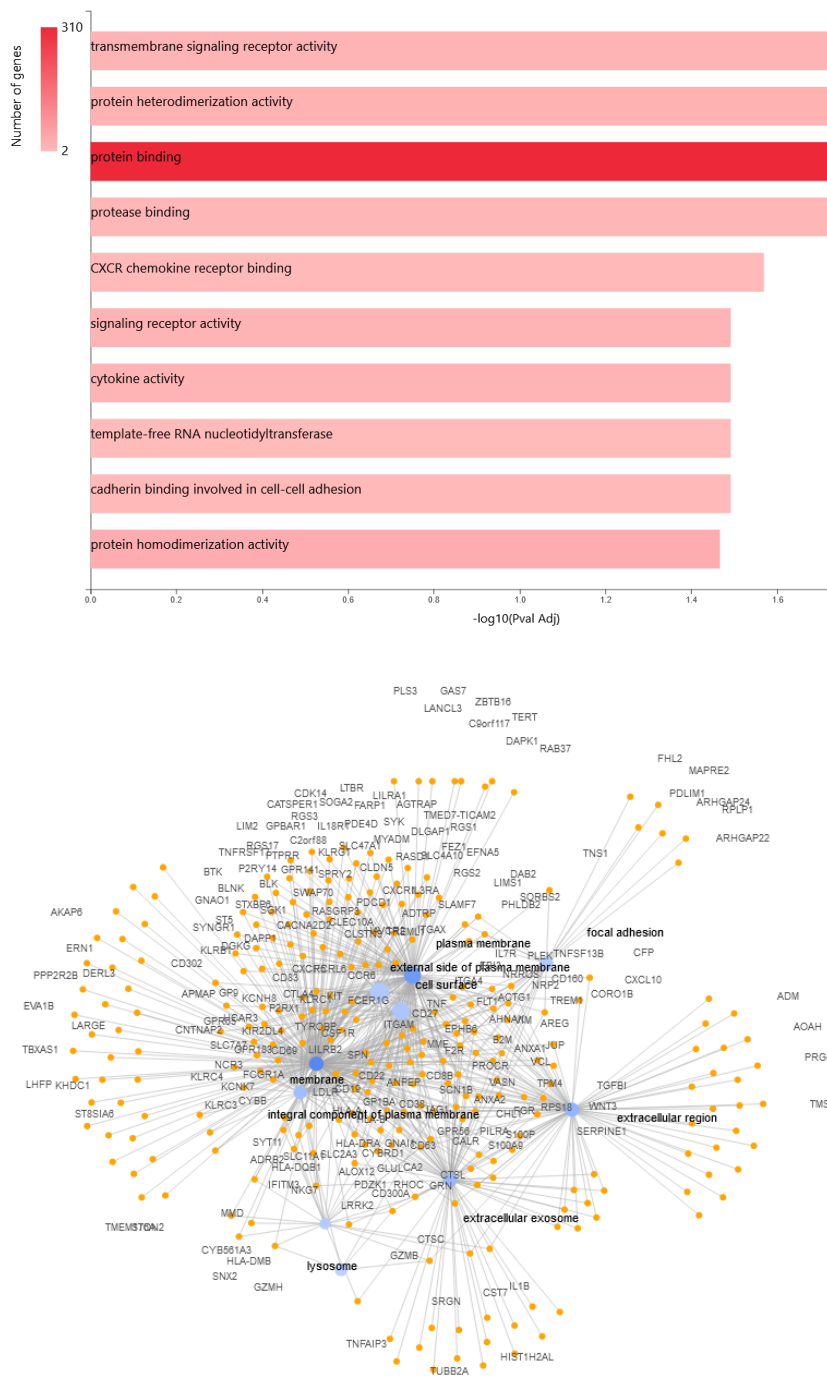

**Figure S5.** GeneCodis ontological analysis and gene-annotation cluster networks. Visualizations generated for 10 top terms of related categories with our identified DEG list are presented here for GO cellular component.
